# Supplementary material for: Low-temperature synthesis of high-entropy amorphous metal oxides (HEOs) for enhanced oxygen evolution performance
Source: Royal Society of Chemistry journal article supplement (doi:10.1039/d4dt00074a), 2024-01-01
Supplement: d4dt00074a1.pdf [file d4dt00074a1.pdf]

## Supplementary Information

### Low-temperature Synthesis of High Entropy Amorphous Metal Oxides (HEOs) for Enhanced Oxygen Evolution Performances

Arpeeta Hota,<sup>a,b,†</sup> Jiban K. Das,<sup>\*a,b,†</sup> Prasanna K. Panda,<sup>a,b</sup> Asim A. Mohammed,<sup>ab</sup> Avijit Biswal,<sup>c</sup> Benadict Rakesh,<sup>a,b</sup> B. C. Tripathy<sup>\*a,b</sup>

a CSIR-Institute of Minerals and Material Technology (CSIR-IMMT), Bhubaneswar, 751013 India,

b Academy of Scientific and Innovative Research (AcSIR), Ghaziabad 201002, India

c Bhadrak (Autonomous) College, Bhadrak, 756100, India

\*E-mail: [bankim@immt.res.in](mailto:bankim@immt.res.in)

\*E-mail: [jibandas100@gmail.com](mailto:jibandas100@gmail.com)

†A.H. and J.K.D. contributed equally to this work.

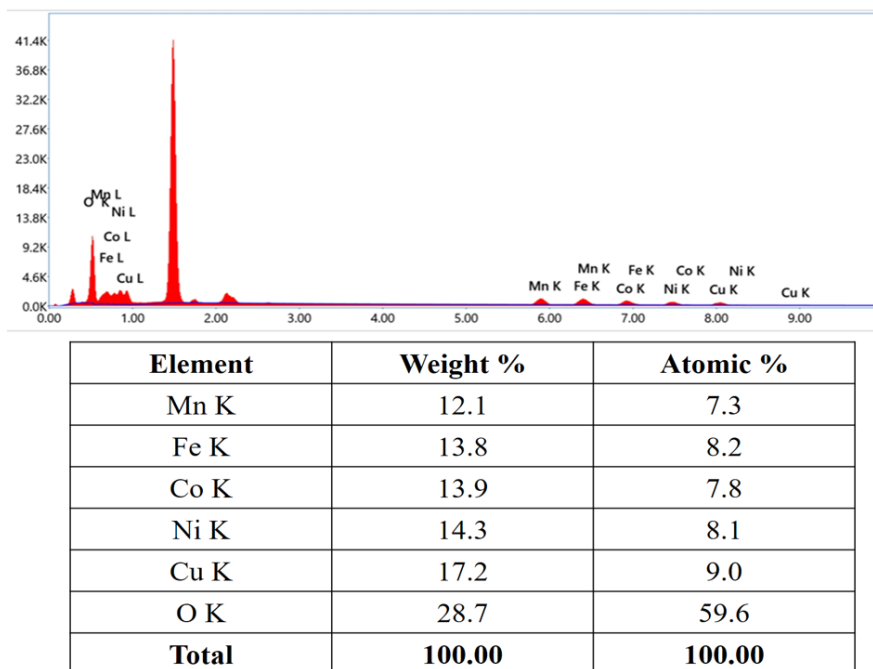

**Fig. S1** EDS analysis and different elemental percentages of the as-prepared material.

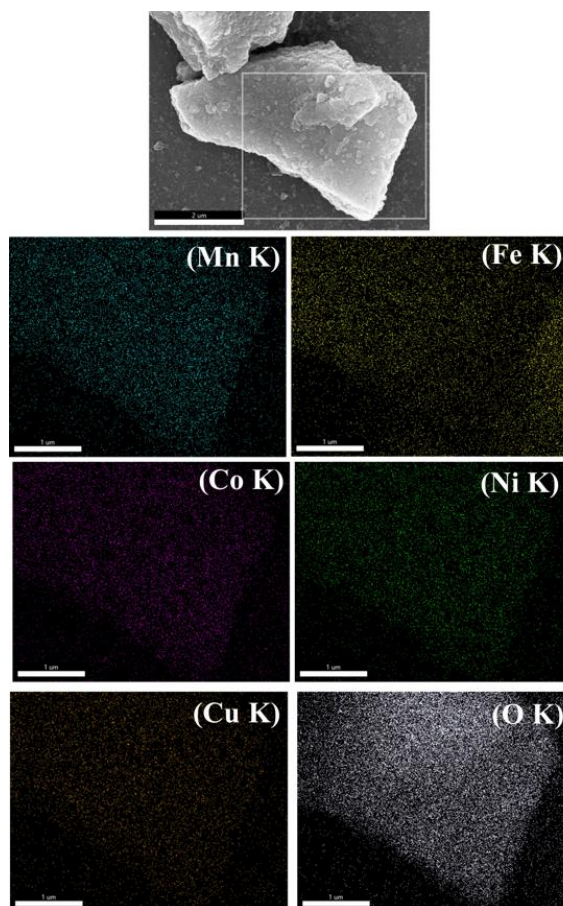

**Fig. S2** Elemental mapping of HEO-110 shows the presence of Mn, Fe, Co, Ni, Cu, and O.

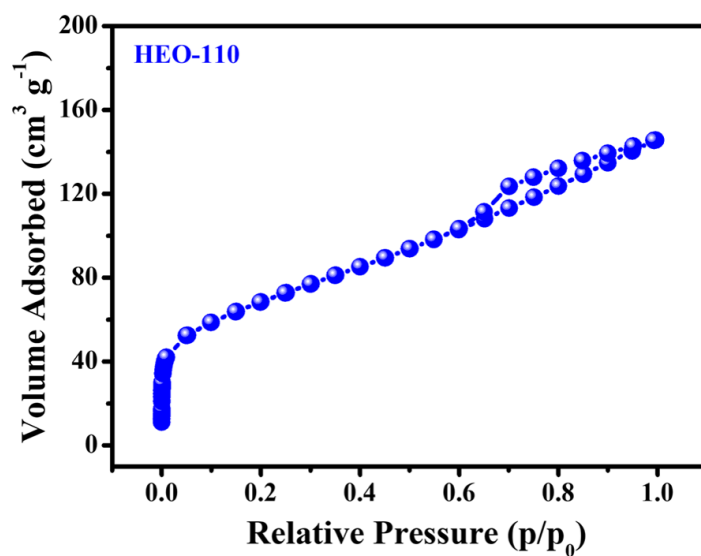

Fig. S3 BET study of high entropy amorphous material.

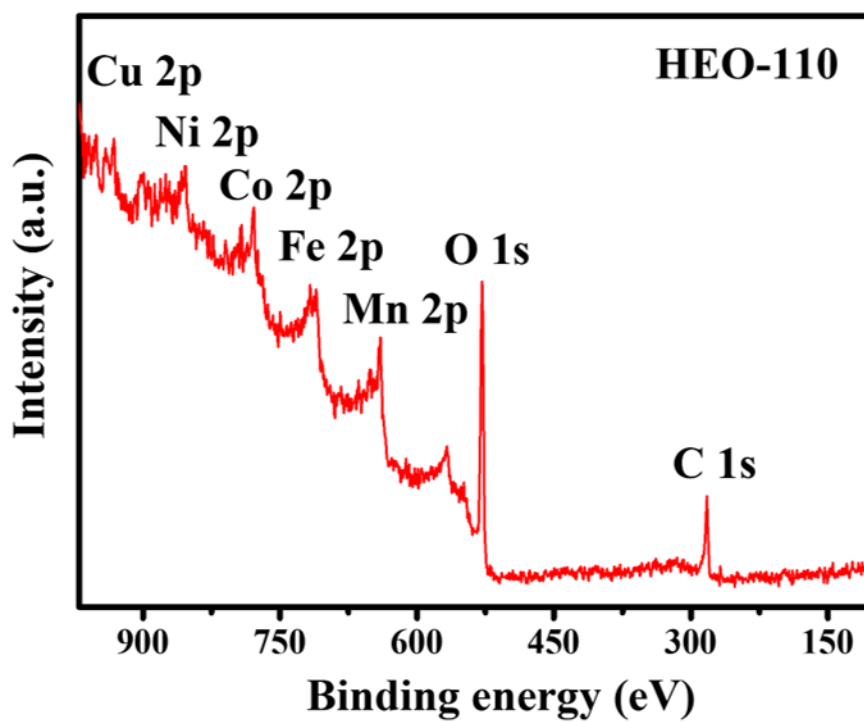

Fig. S4 Elemental survey analysis of amorphous HEO-110.

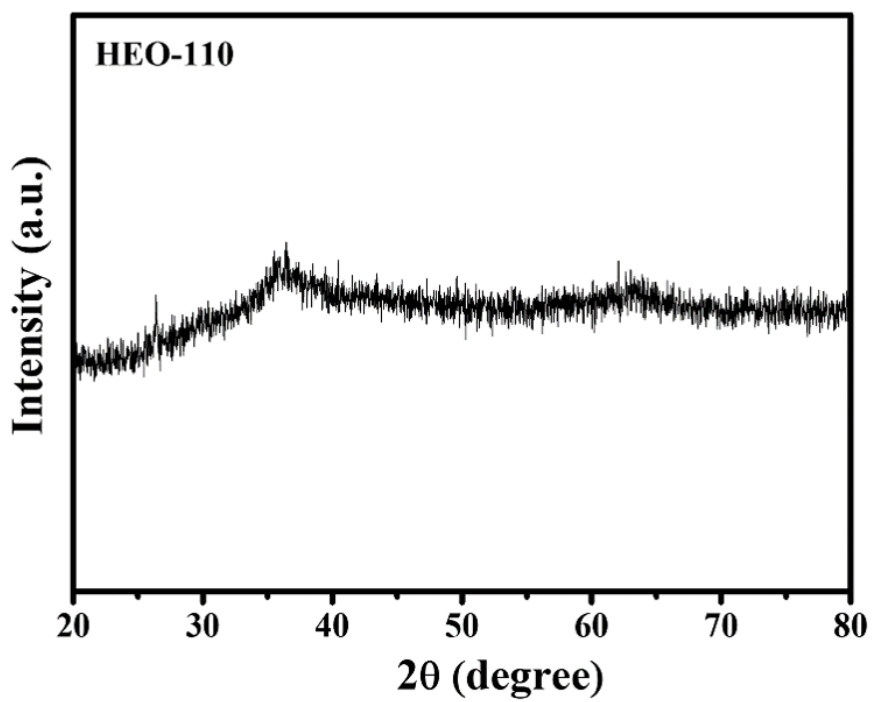

**Fig. S5** Post stability PXRD of the synthesized electrode material.

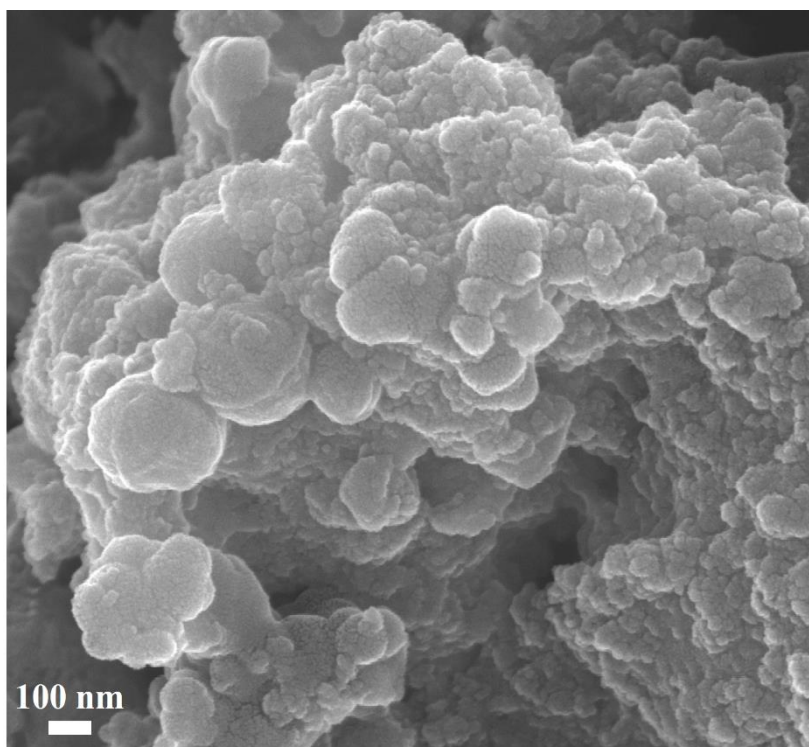

**Fig. S6** FESEM image after 20 h of stability test in 1 M KOH.

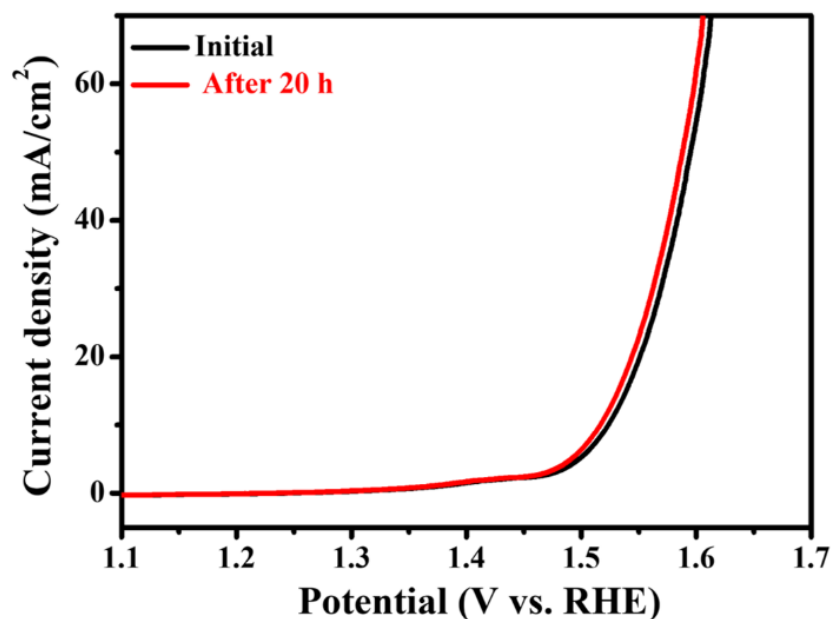

**Fig. S7** LSV curves of HEO-110 before and after stability test.

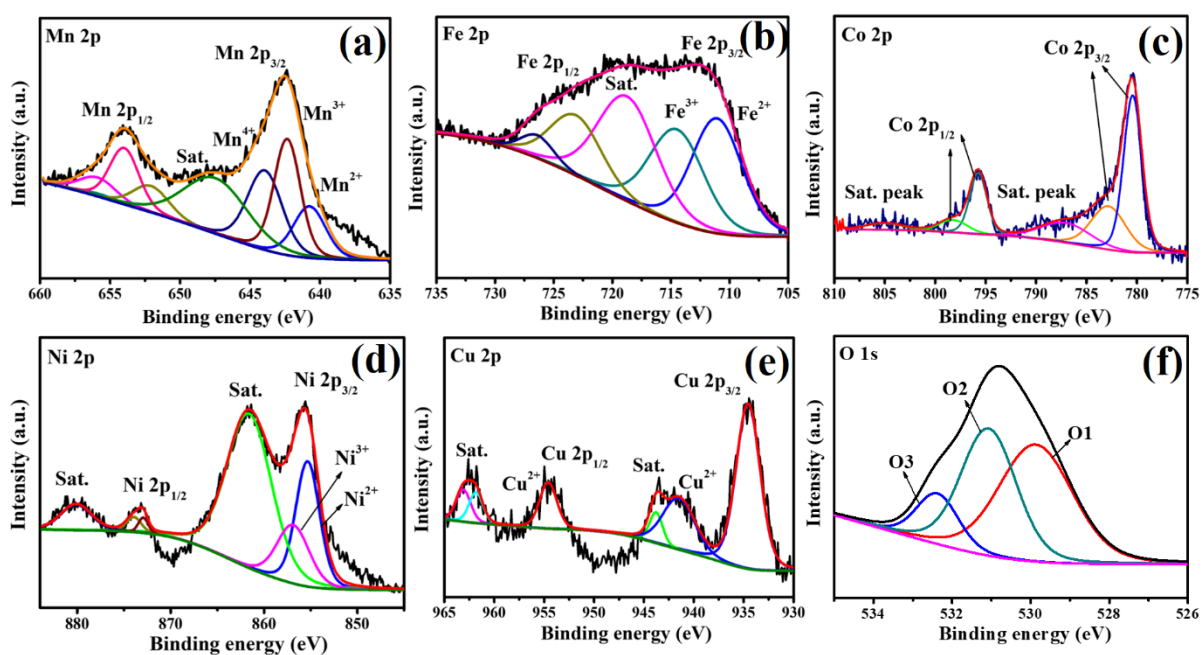

**Fig. S8** Post-stability X-ray photoelectron spectra of high entropy amorphous metal oxides (HEO-110). Corresponding Mn 2p (a), Fe 2p (b), Co 2p (c), Ni 2p (d) Cu 2p (e), and O 1s (f), respectively.

**Table S1** A brief literature study of high entropy electrode material for OER.

| SL No. | Electrocatalyst                                                                                                                          | Electrolyte | Overpotential at 10 mA/cm <sup>2</sup> (mV) | Tafel slope (mV/dec) | References                                                     |
|--------|------------------------------------------------------------------------------------------------------------------------------------------|-------------|---------------------------------------------|----------------------|----------------------------------------------------------------|
| 1      | (Cr <sub>0.2</sub> Mn <sub>0.2</sub> Fe <sub>0.2</sub> Co <sub>0.2</sub> Ni <sub>0.2</sub> ) <sub>3</sub> O <sub>4</sub>                 | 1 M KOH     | 332                                         | 54.5                 | Chemical Engineering Journal, 2022, 431, 133448                |
| 2      | (CoNiMnZnFe) <sub>3</sub> O <sub>4</sub>                                                                                                 | 1 M KOH     | 336                                         | 47.5                 | Journal of Alloys and Compounds, 2021. 868, 159064             |
| 3      | (Fe <sub>0.2</sub> Co <sub>0.2</sub> Ni <sub>0.2</sub> Cr <sub>0.2</sub> Mn <sub>0.2</sub> ) <sub>3</sub> O <sub>4</sub>                 | 1 M KOH     | 275                                         | 50.27                | Chemical Engineering Journal, 2023. 460, 141675                |
| 4      | (CoCuFeMnNi) <sub>3</sub> O <sub>4</sub>                                                                                                 | 1 M KOH     | 400                                         | 76.7                 | Journal of Materials Chemistry A, 2019, 7(42), 24211-24216.    |
| 5      | (Co <sub>0.2</sub> Mn <sub>0.2</sub> Ni <sub>0.2</sub> Fe <sub>0.2</sub> Zn <sub>0.2</sub> ) <sub>3</sub> Fe <sub>2</sub> O <sub>4</sub> | 1 M KOH     | 326                                         | 53.6                 | ACS applied materials & interfaces, 2020, 12(29), 32548-32555. |
| 6      | (FeCrCoNiAl <sub>0.1</sub> )O <sub>x</sub>                                                                                               | 1 M KOH     | 381                                         | 60.9                 | Journal of Alloys and Compounds, 2021, 868,159108.             |

|   |                                                   |         |     |      |                                                                   |
|---|---------------------------------------------------|---------|-----|------|-------------------------------------------------------------------|
| 7 | $\text{La}(\text{CrMnFeCo}_2\text{Ni})\text{O}_3$ | 1 M KOH | 325 | 51.2 | Advanced<br>Functional<br>Materials,<br>2021, 31(27),<br>2101632. |
| 8 | $(\text{MnFeCoNiCu})_3\text{O}_4$                 | 1 M KOH | 290 | 85   | <b>Our Work</b>                                                   |
